# Supplementary material for: Long-read RNA sequencing identifies region- and sex-specific C57BL/6J mouse brain mRNA isoform expression and usage
Source: PubMed Central journal article supplement (PMC11188239; doi:10.1186/s13041-024-01112-7), 2024-06-20

**Supplementary Figure 1. Novel transcripts are expressed more highly than annotated transcripts.** Density plot showing expression levels (measured in counts per million, CPM) between the novel (yellow) and annotated (blue) transcripts. Density is calculated by kernel density estimation. When we ran a one-sided Wilcoxon rank sum test at 5 mean CPM thresholds (**A** - 0 CPM, **B** - 1 CPM, **C** - 2 CPM, **D** - 5 CPM, and **E** - 8 CPM), the two distributions were significantly different at every level.

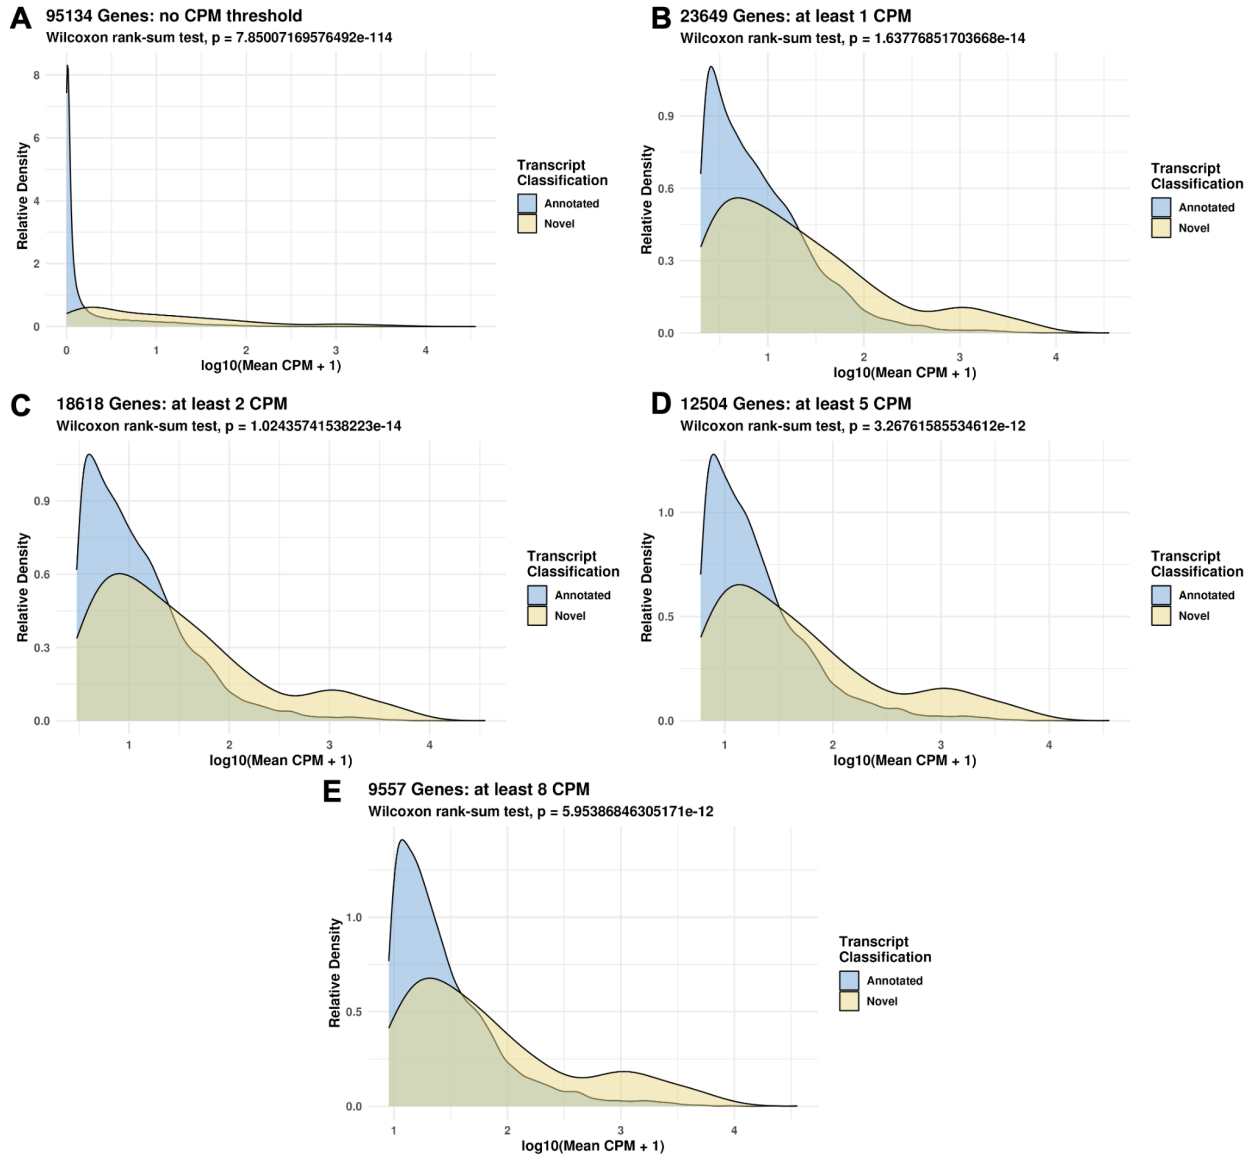

**Supplementary Figure 2. Genes with DTU across sex for the whole brain.** SwitchPlots showing transcript summary, gene expression, isoform expression, and isoform usage of the genes for all brain regions across males (M; dark gray) and females (F; light gray). Genes shown are *Zfp324* (A), *Zfp862-ps* (B), *Shisa5* (C), and unannotated gene or *Gm10605* (D).

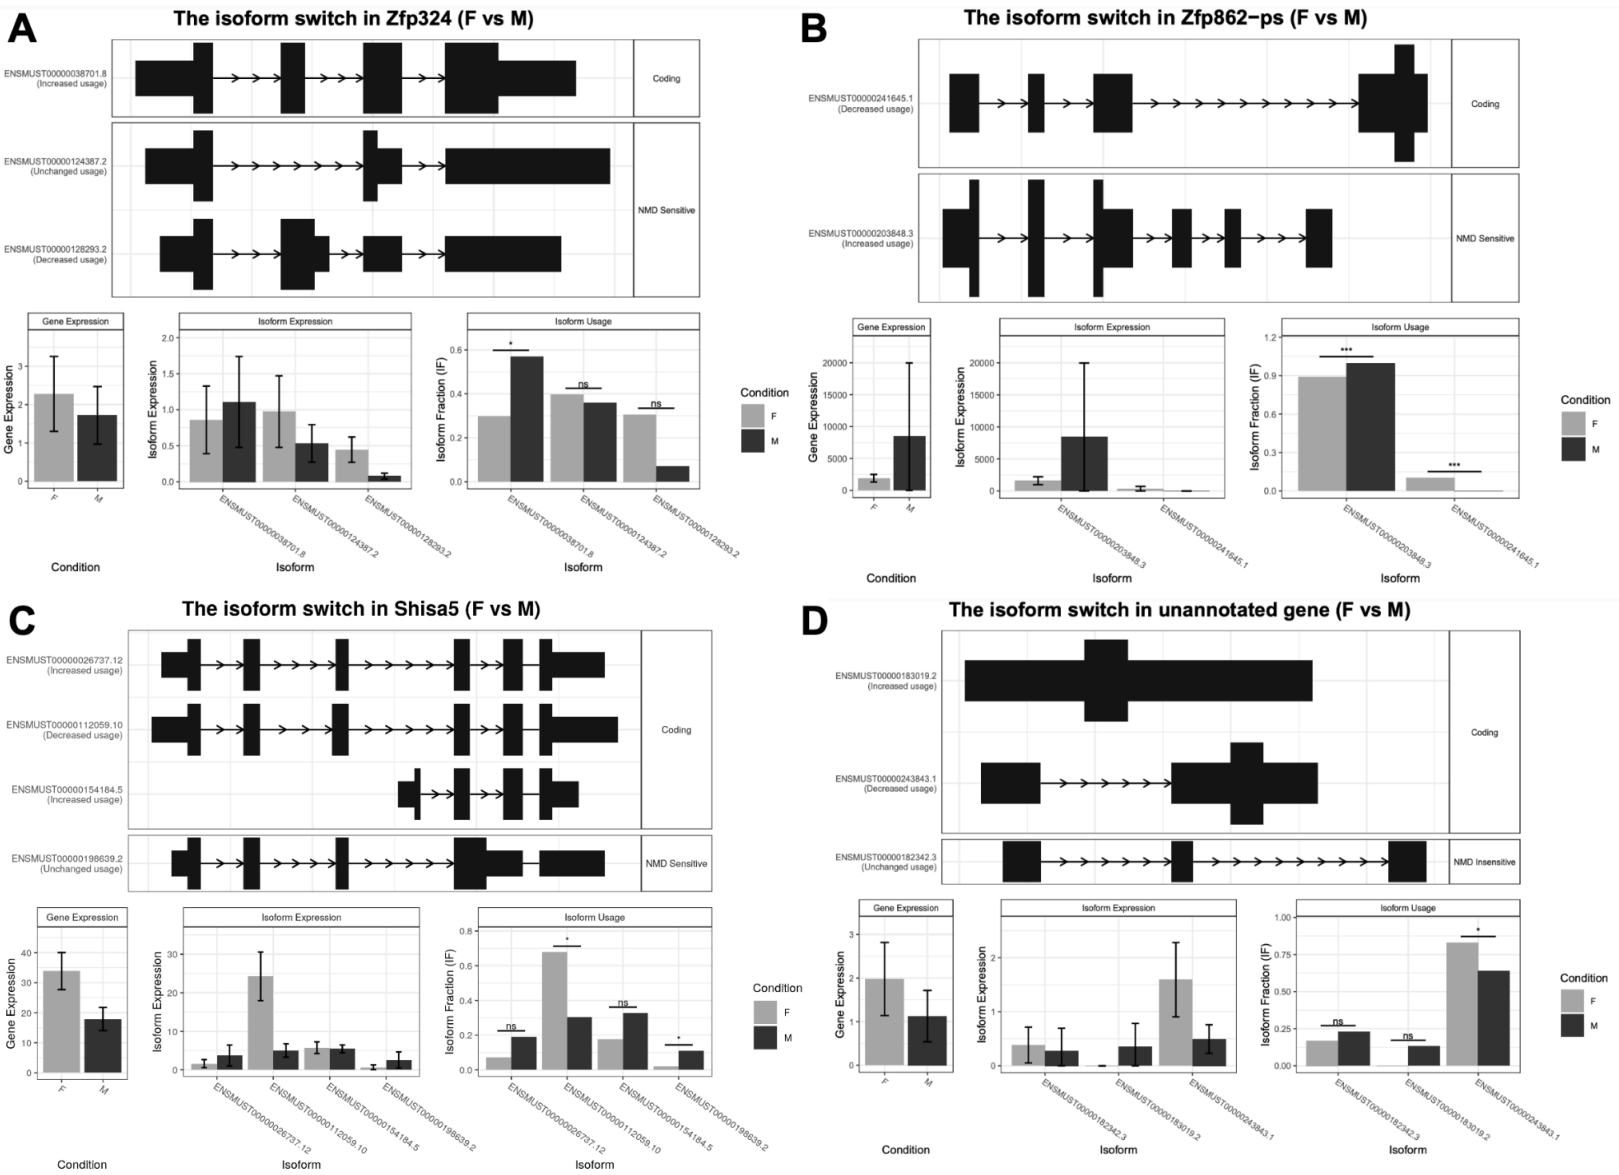

**Supplementary Figure 3. *Tsr2* has a non-significant presence or absence of female-specific transcripts in the hippocampus.** SwitchPlot showing transcript summary, gene expression, isoform expression, and isoform usage of the genes for all brain regions across males (M; dark gray) and females (F; light gray).

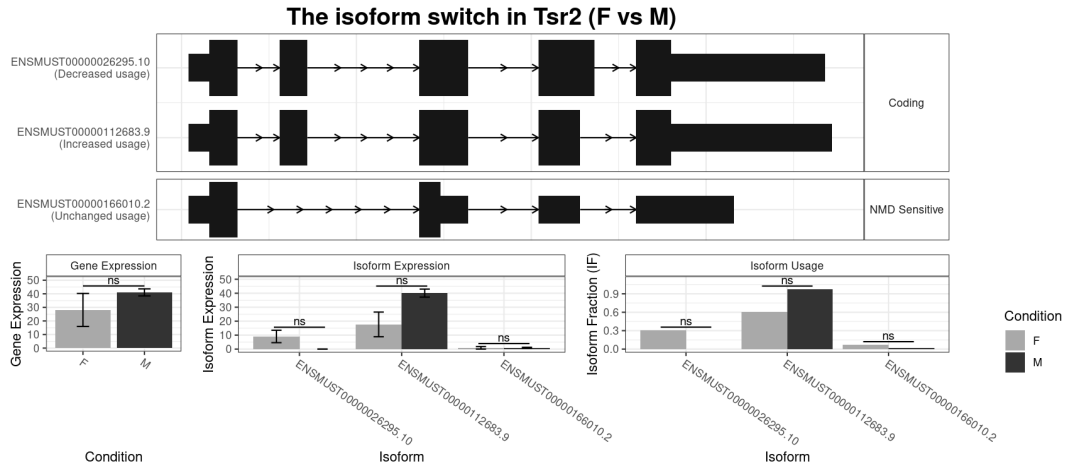

Supplement: 13041_2024_1112_MOESM8_ESM.pdf [file 13041_2024_1112_MOESM8_ESM.pdf]
